# Supplementary material
Source: PubMed Central journal article supplement (PMC4429798)
Supplement: NIHMS655878-supplement-1.pdf [file NIHMS655878-supplement-1.pdf]

## Supplementary Information Titles

*Please list each supplementary item and its title or caption, in the order shown below.*

**Note that we do NOT copy edit or otherwise change supplementary information, and minor (nonfactual) errors in these documents cannot be corrected after publication.**

Please submit document(s) exactly as you want them to appear, with all text, images, legends and references in the desired order, and check carefully for errors.

|                                 |
|---------------------------------|
| <b>Journal:</b> Nature Medicine |
|---------------------------------|

|                              |                                                                                                 |
|------------------------------|-------------------------------------------------------------------------------------------------|
| <b>Article Title:</b>        | LTB4 causes macrophage-mediated inflammation and directly induces insulin resistance in obesity |
| <b>Corresponding Author:</b> | Jerrold M. Olefsky                                                                              |
|                              |                                                                                                 |

| <b>Supplementary Item &amp; Number</b><br>(add rows as necessary) | <b>Title or Caption</b>                                                                                                                                                                 |
|-------------------------------------------------------------------|-----------------------------------------------------------------------------------------------------------------------------------------------------------------------------------------|
| Supplementary Figure 1                                            | GTT in WT and Ltb4r1 KO mice fed chow.                                                                                                                                                  |
| Supplementary Figure 2                                            | GTT of HFD female ovariectomized (OVX) mice treated with vehicle or Ltb4r1 inhibitor.                                                                                                   |
| Supplementary Figure 3                                            | Effect of Ltb4r1 inhibitor treatment on viability of RAW cells.                                                                                                                         |
| Supplementary Figure 4                                            | Fluorescence minus one (FMO) for the FACS analysis. Epididymal fat pads were dissected and separated into adipocyte and SVC populations.                                                |
| Supplementary Figure 5                                            | Effect of Ltb4r1 inhibitor treatment (2 weeks) in adipose tissue.                                                                                                                       |
| Supplementary Figure 6                                            | Effect of pertussis toxin (PT) pretreatment on p-Akt in <b>(a)</b> L6 myocytes and <b>(b)</b> hepatocytes                                                                               |
| Supplementary Figure 7                                            | Effect of Jnk inhibitor treatment on glucose uptake and p-Akt in L6 cells                                                                                                               |
| Supplementary Figure 8                                            | <b>(a)</b> Effect of Ltb4r1 inhibitor on LTB4 induced hepatic glucose production in primary hepatocytes. <b>(b)</b> Effect of LTB4 on glucose uptake in 3T3L1 differentiated adipocyte. |

Supplementary Fig.1 Li

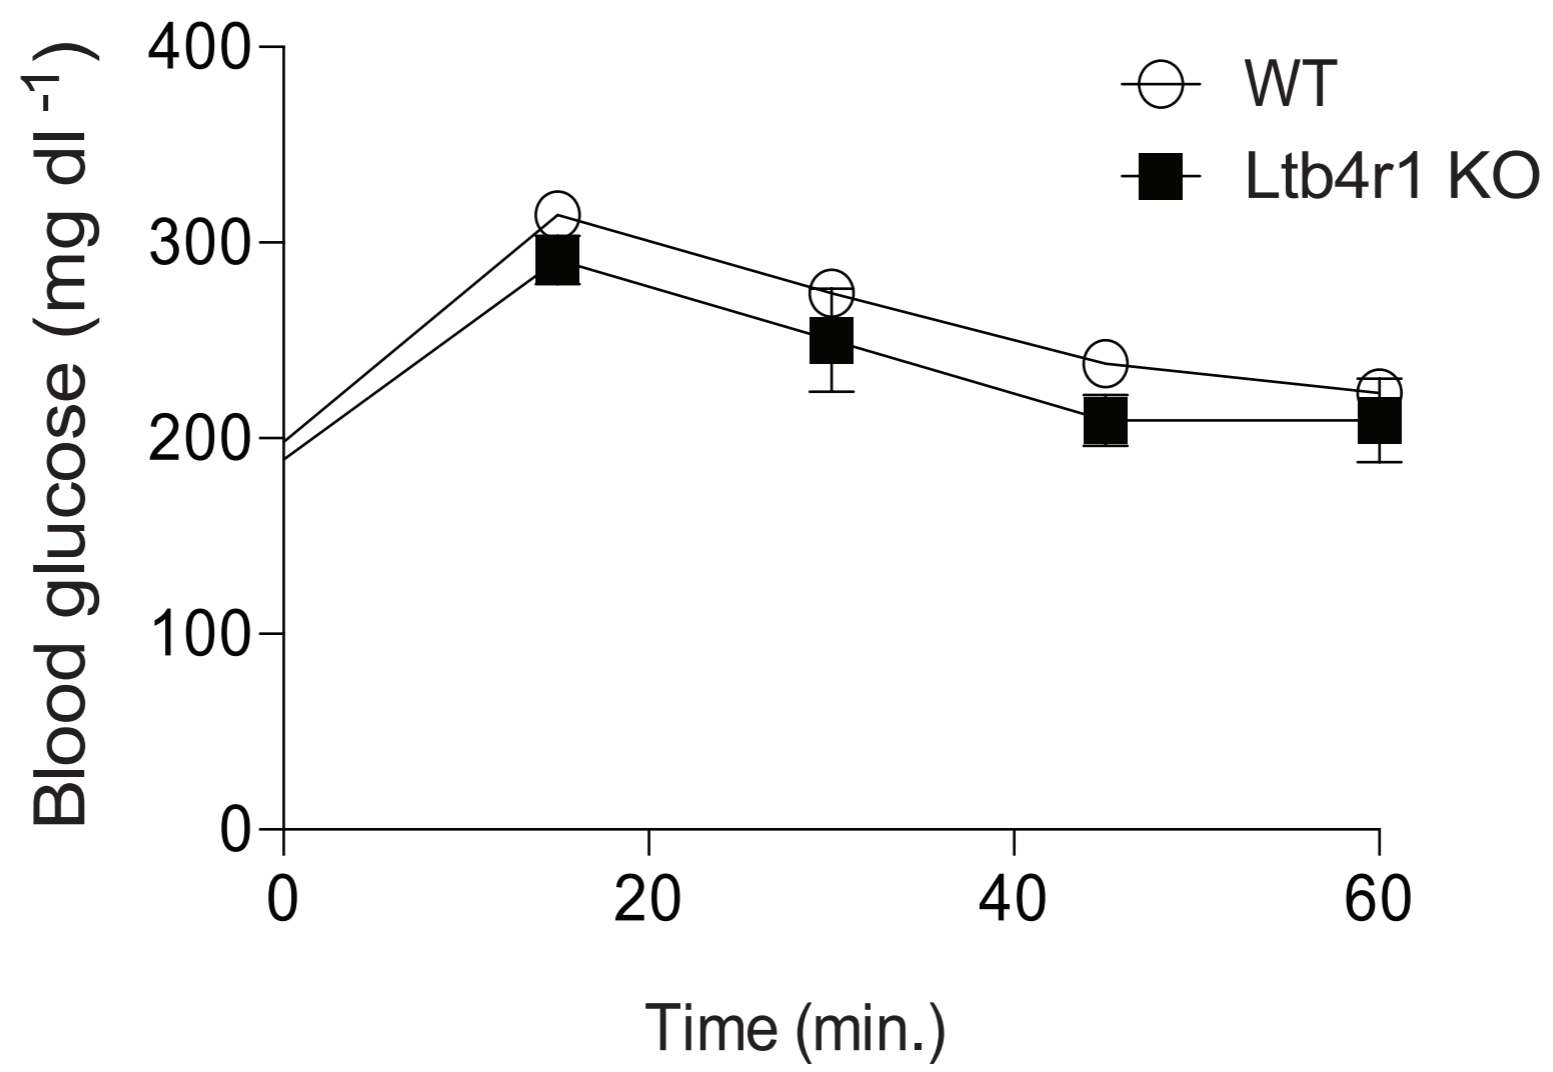

**Supplementary Fig.1** GTT in WT and Ltb4r1 KO mice fed chow. Data were analyzed by two-way ANOVA followed by Bonferroni post tests. Values are expressed as mean  $\pm$  s.e.m. n=8.

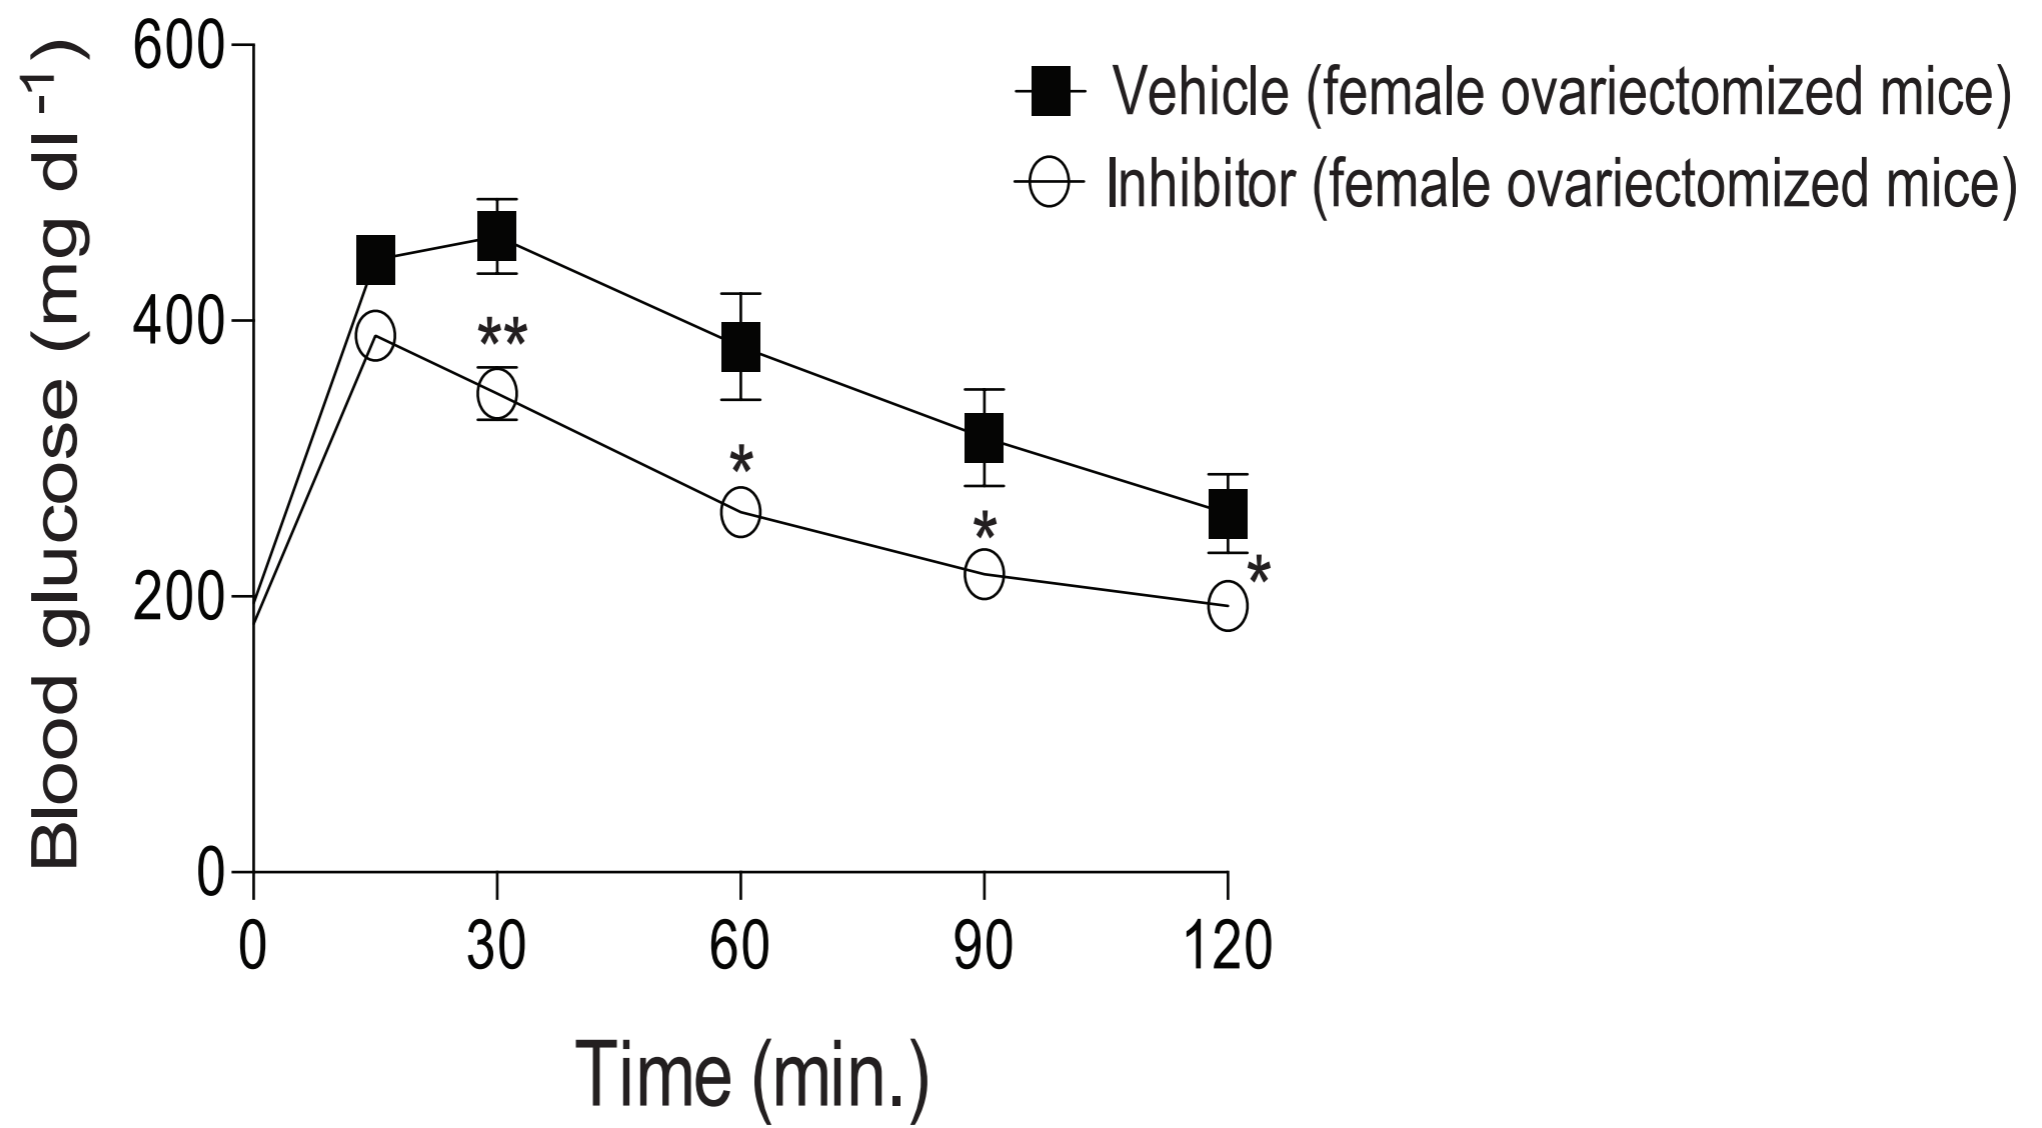

**Supplementary Fig. 2** GTT of HFD female ovariectomized (OVX) mice treated with vehicle or Ltb4r1 inhibitor. Data were analyzed by two-way ANOVA followed by Bonferroni post tests. Values are expressed as mean  $\pm$  s.e.m. n=10. \* P<0.05, \*\* P<0.01 for vehicle versus treatment.

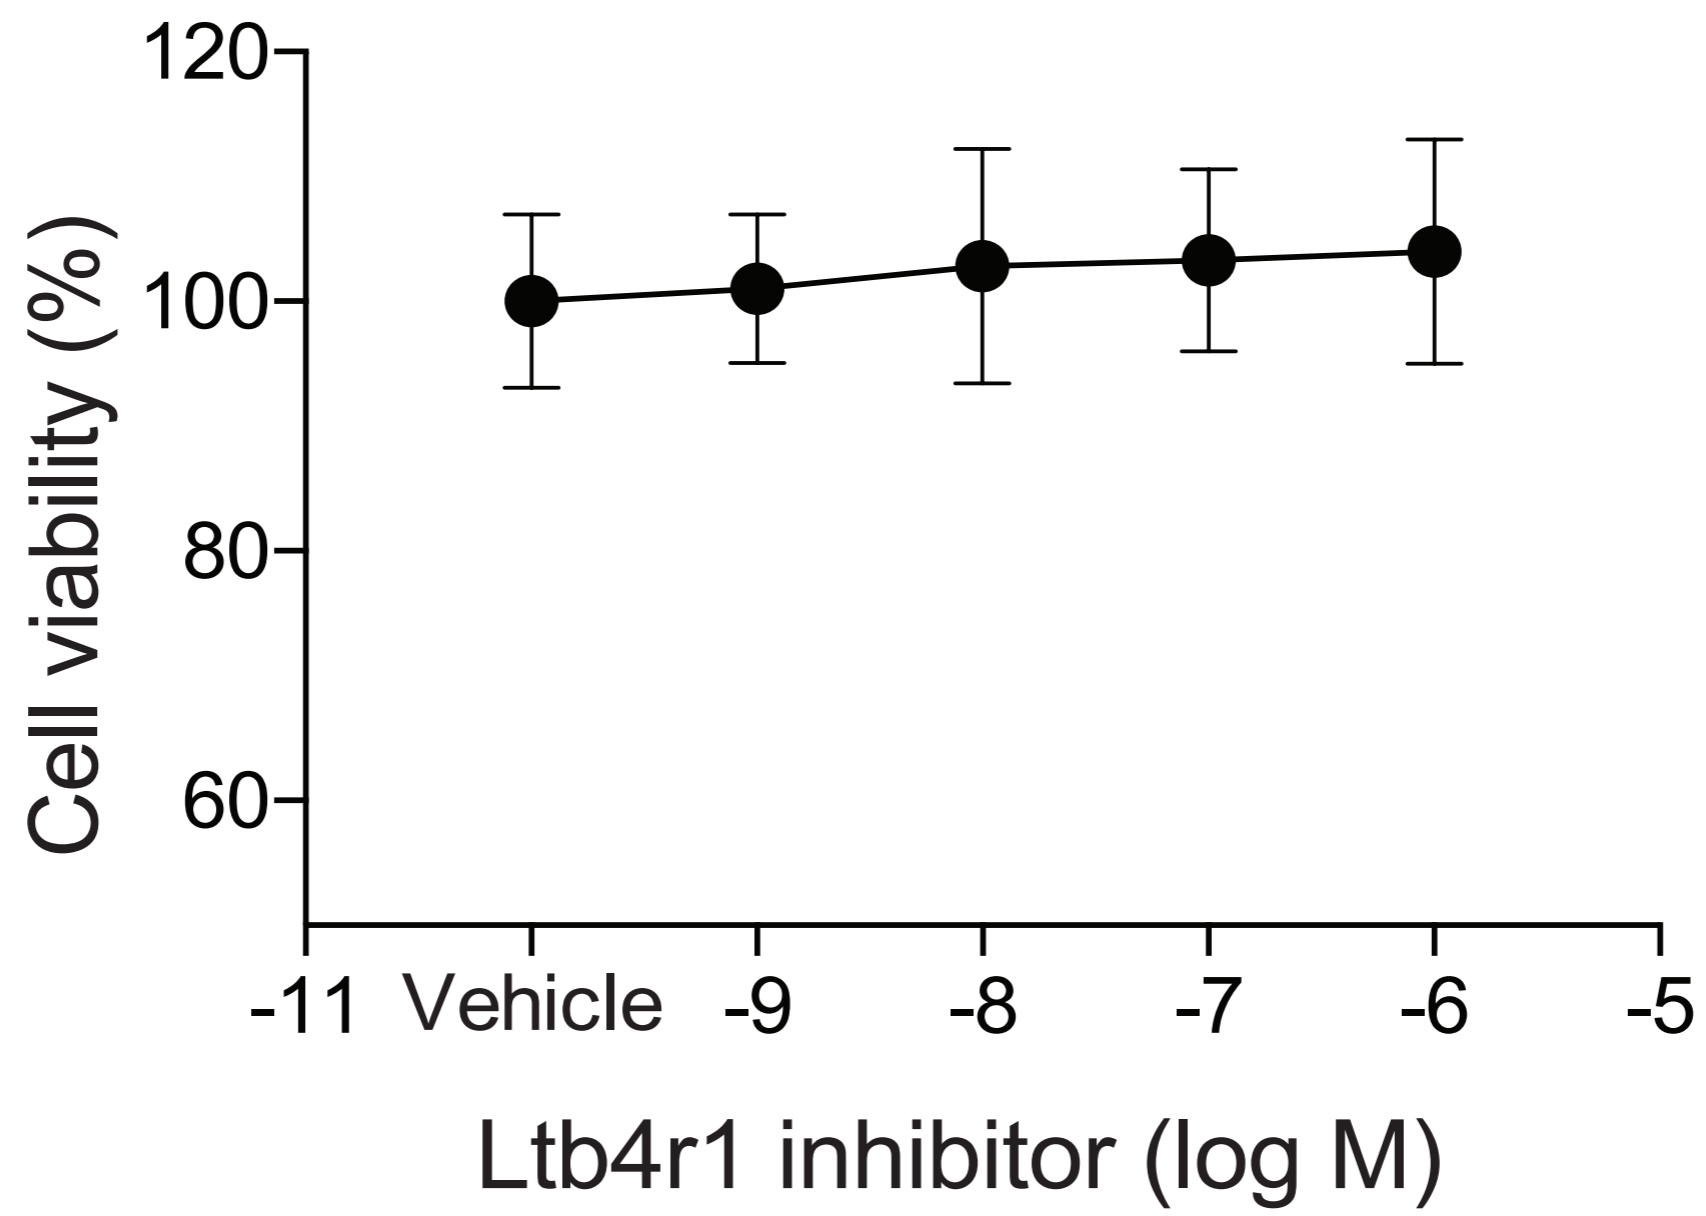

**Supplementary Fig. 3** Effect of Ltb4r1 inhibitor treatment on viability of RAW cells. Data were analyzed by two-way ANOVA followed by Bonferroni post tests. Values are expressed as mean  $\pm$  s.e.m. n=6.

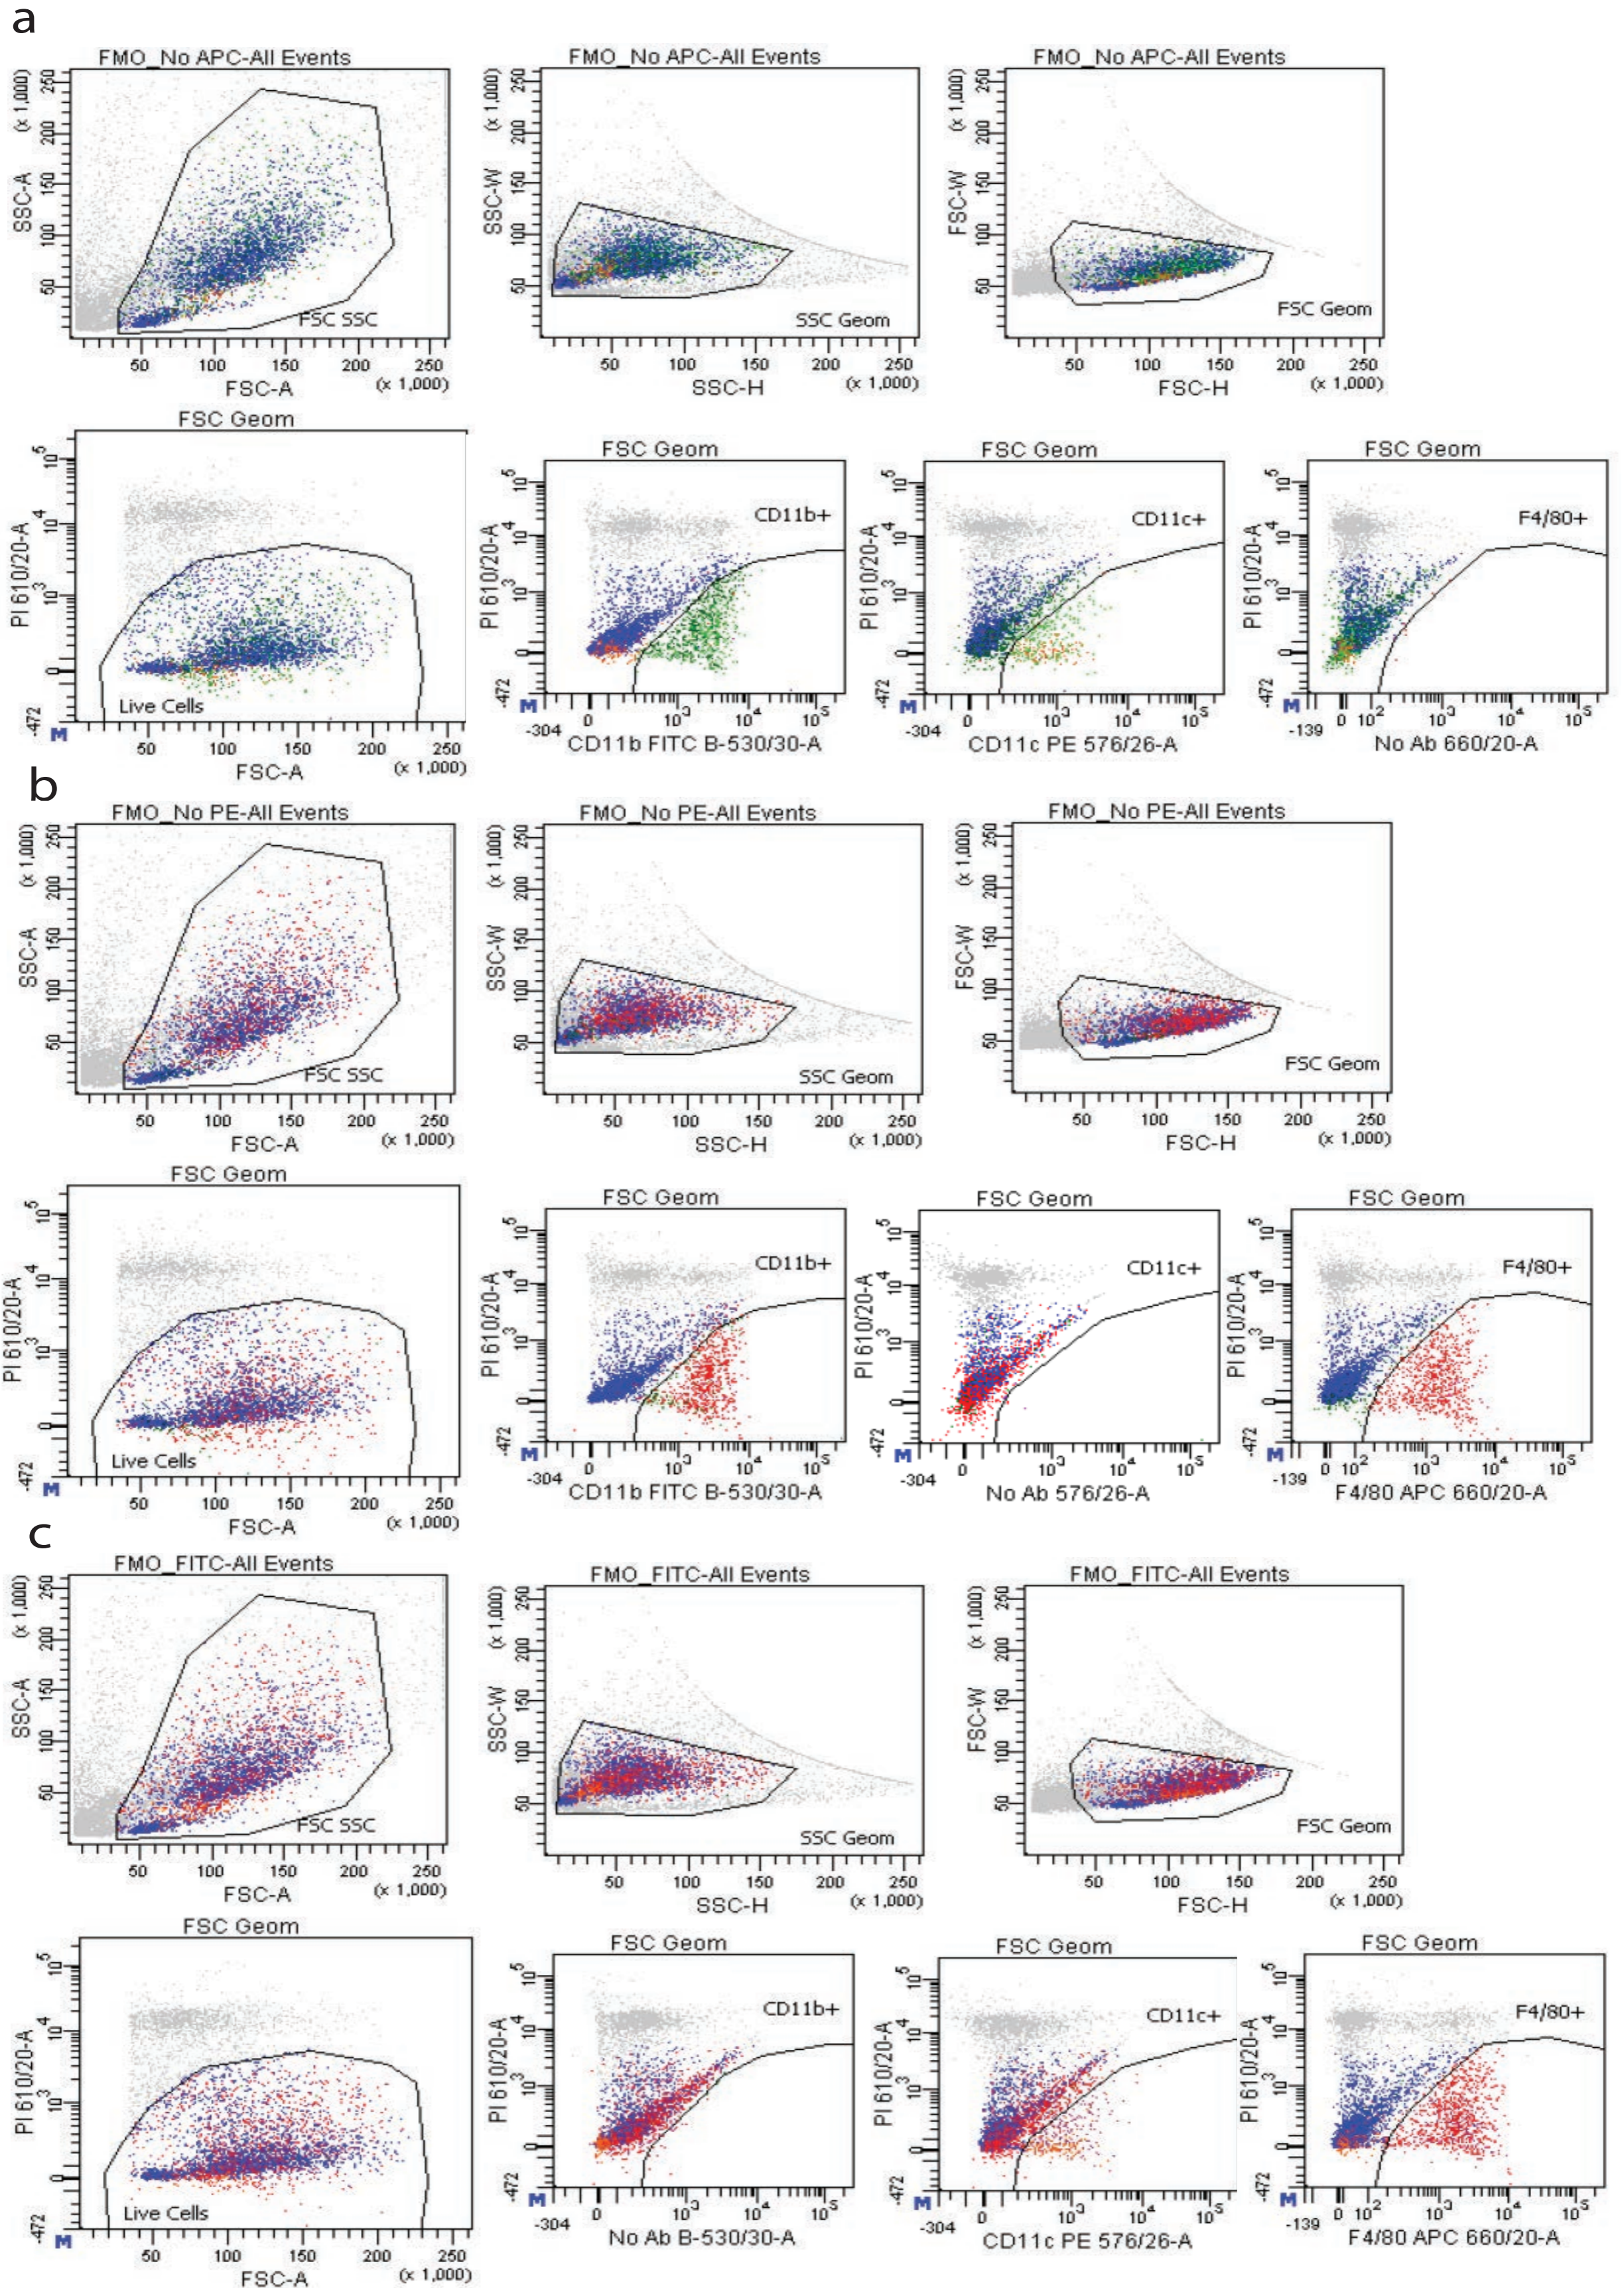

**Supplementary Fig. 4** Fluorescence minus one (FMO) for the FACS analysis. Epididymal fat pads were dissected and separated into adipocyte and SVC populations. Stromal vascular cells (SVCs) were stained with antibody with F4/80-APC, CD11b-FITC, CD11c-PE or PI. **(a)** SVCs were stained with CD11b-FITC, CD11c-PE, and PI. **(b)** SVCs were stained with F4/80-APC, CD11b-FITC and PI. **(c)** SVCs were stained with F4/80-APC, CD11c-PE and PI.

Supplementary Fig.5 Li

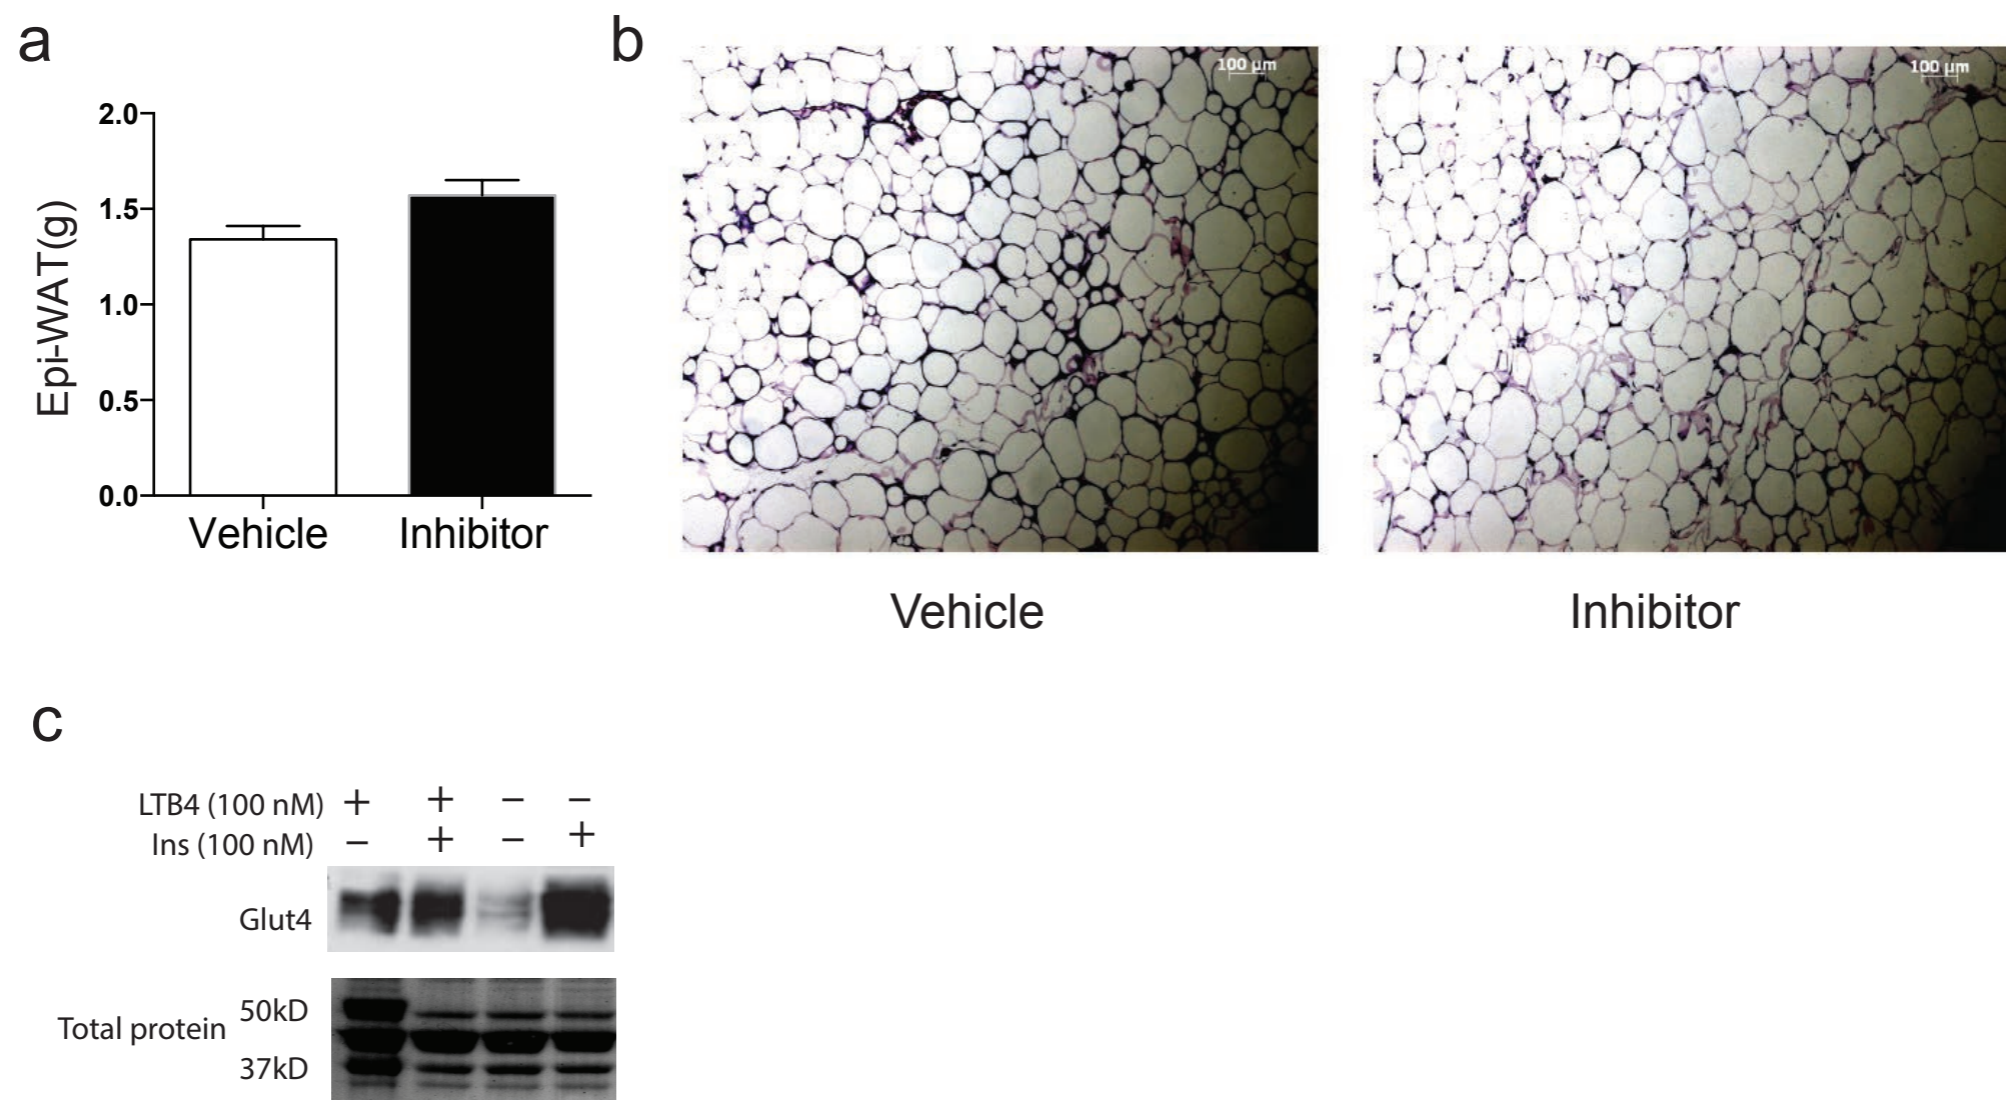

**Supplementary Fig. 5** Effect of Ltb4r1 inhibitor treatment (2 weeks) in adipose tissue. **(a)** Epi-WAT mass. **(b)** HE staining of Epi-WAT. **(c)** Effect of LTB4 on insulin induced Glut4 translocation to the plasma membrane in L6 cells. Data were analyzed by two-way ANOVA followed by Bonferroni post tests. Values are expressed as mean  $\pm$  SEM. n=6 in a-b. Western blot data are represented of more than 3 independent experiments.

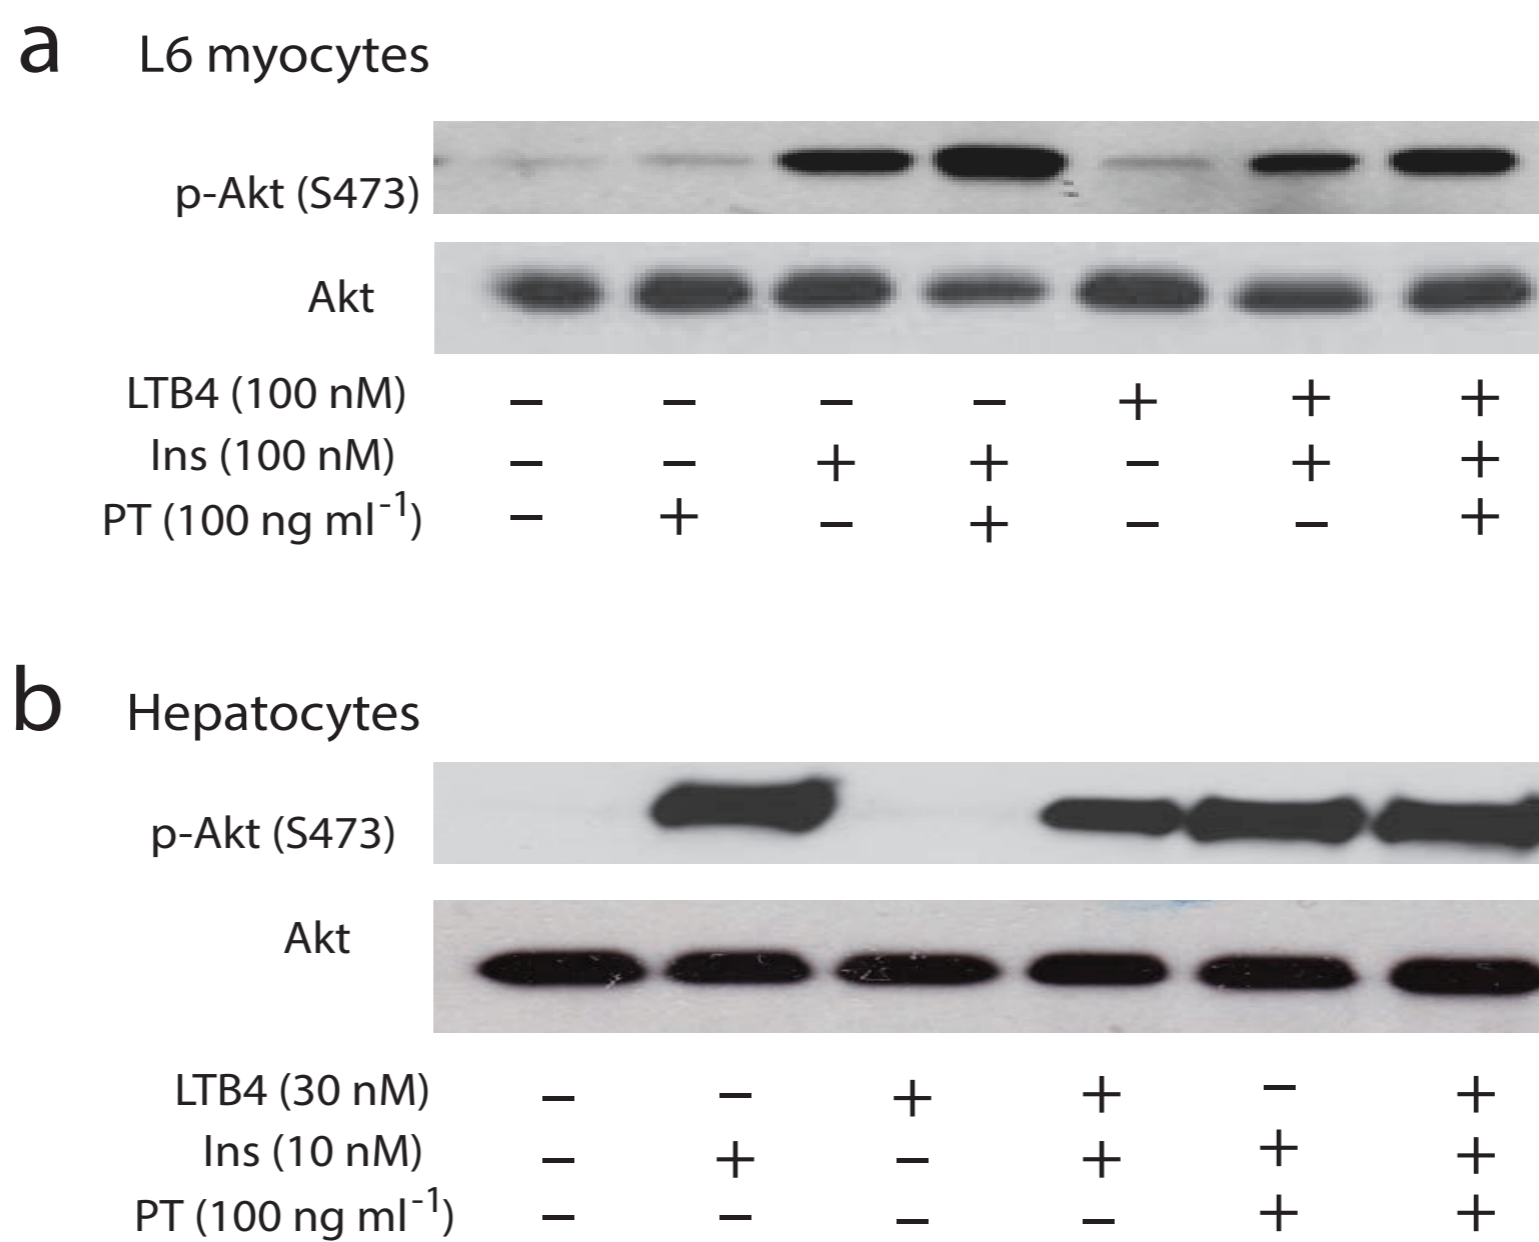

**Supplementary Fig. 6** Effect of pertussis toxin (PT) pretreatment on p-Akt in (a) L6 myocytes and (b) hepatocytes. Western blot data are represented of more than 3 independent experiments.

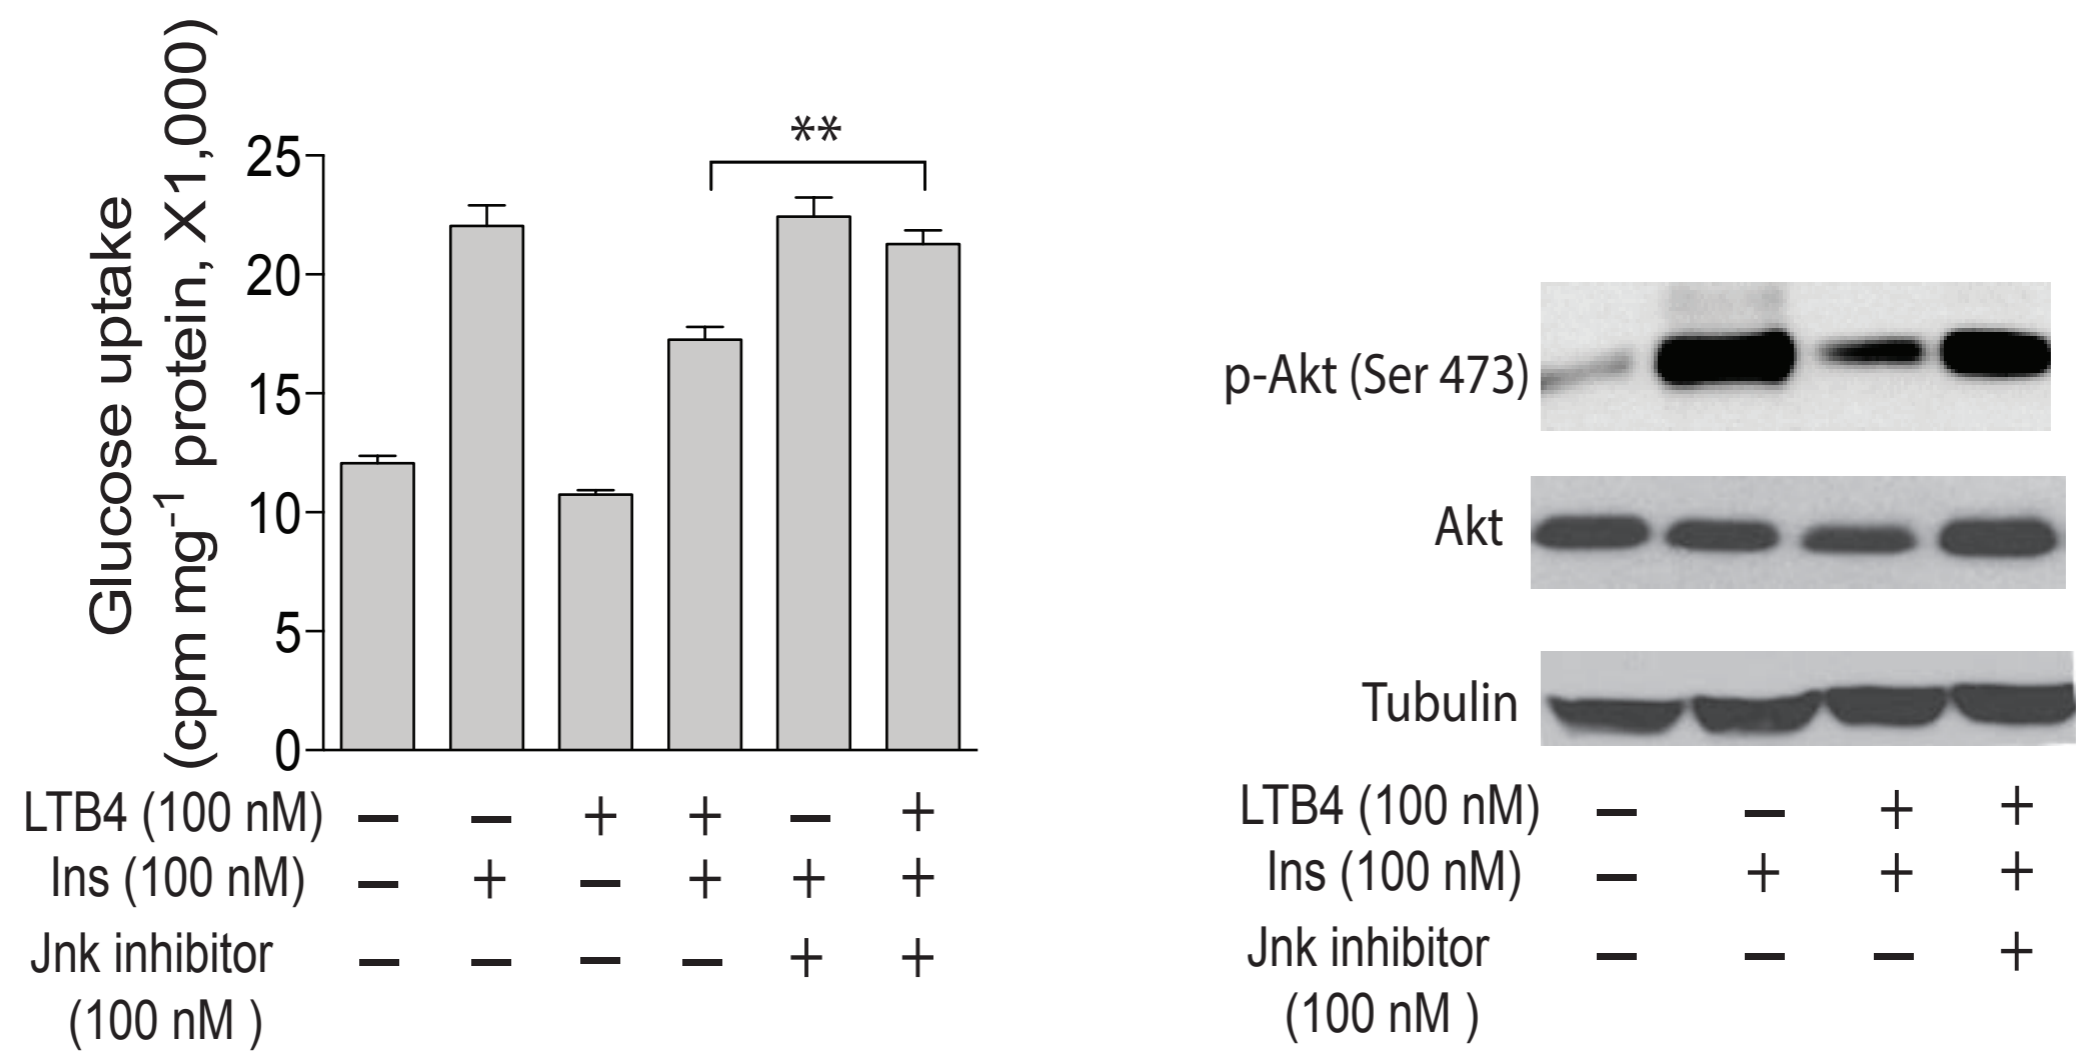

**Supplementary Fig. 7** Effect of Jnk inhibitor treatment on glucose uptake and p-Akt in L6 cells. Data were analyzed by two-way ANOVA followed by Bonferroni post tests. Values are expressed as mean  $\pm$  s.e.m. n=6. Western blot data are represented of more than 3 independent experiments.



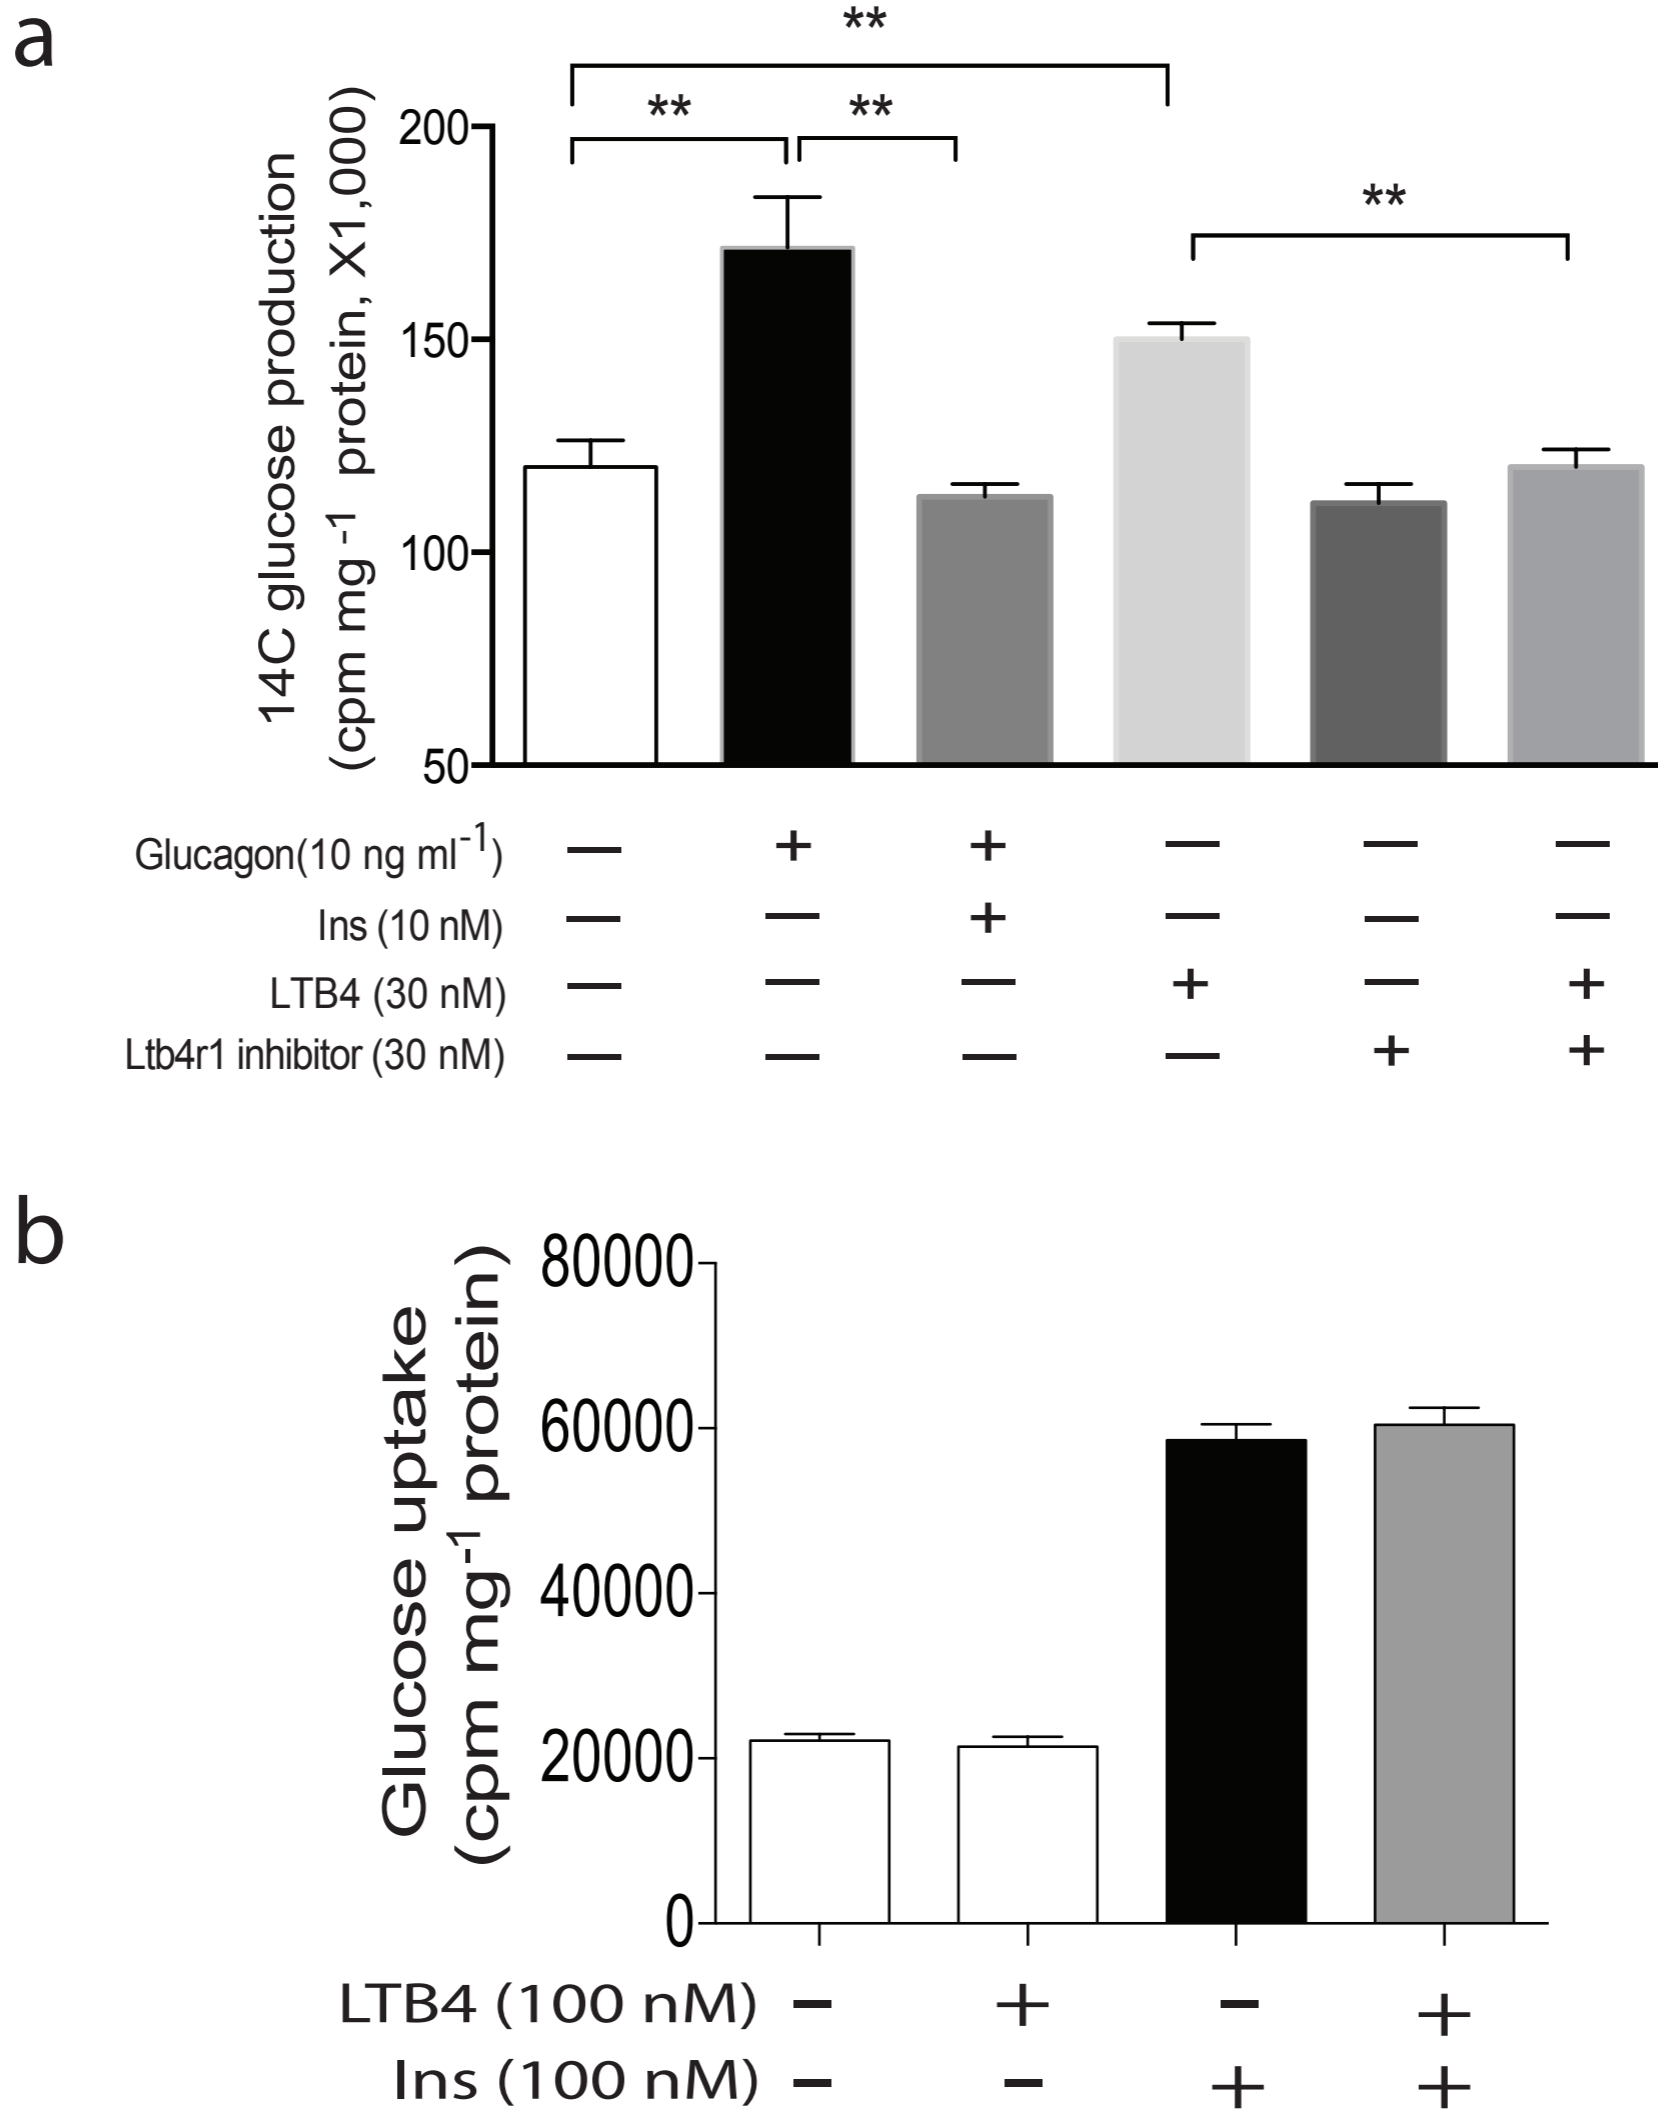

**Supplementary Fig. 8** (a) Effect of Ltb4r1 inhibitor on LTB4 induced hepatic glucose production in primary hepatocytes. (b). Effect of LTB4 on glucose uptake in 3T3L1 differentiated adipocyte. Data were analyzed by two-way ANOVA followed by Bonferroni post tests. Values are expressed as mean  $\pm$  s.e.m. n=6. \*\* P<0.01.
